# Supplementary material for: Rapid prediction of damage on a struck ship accounting for side impact scenario models
Source: publisher site journal article supplement (doi:10.1515/eng-2017-0014), 2017-04-22
Supplement: Supplementary file 1 [file eng-2017-0014_sm1.pdf]

# Appendix A\*

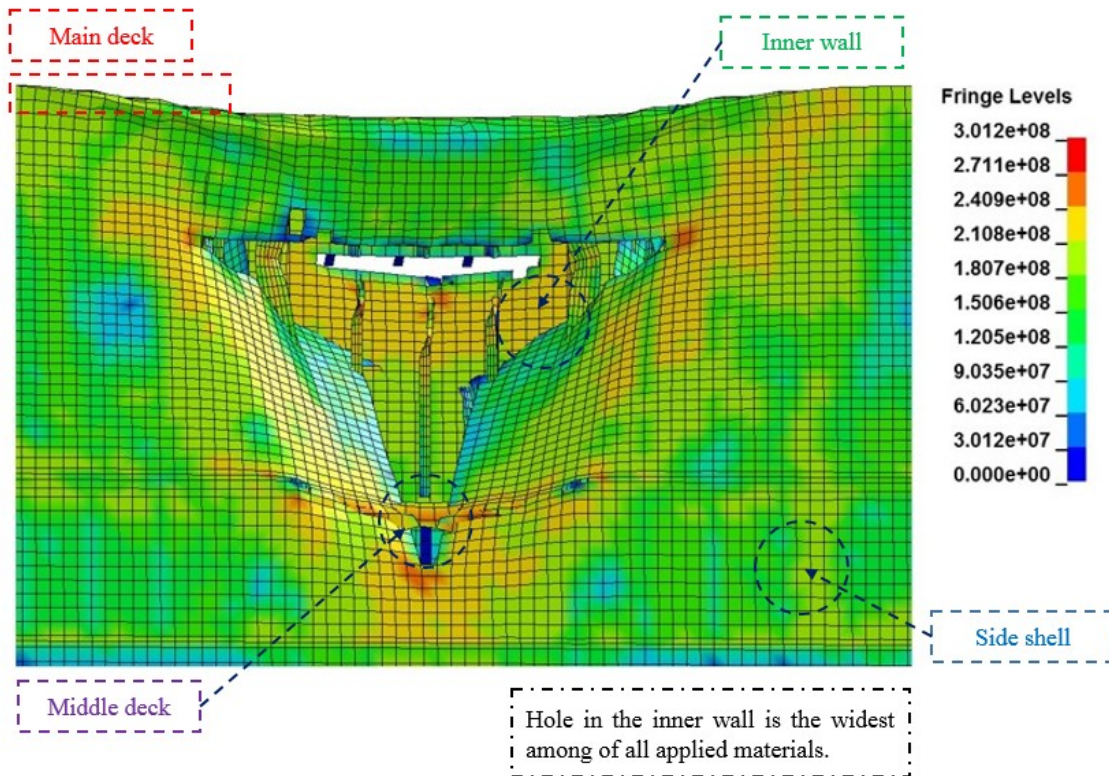

**Figure A-1:** Damage extent with Tresca contour by applied material type 1010.

\* connected to the paper "Rapid prediction of damage on a struck ship accounting for side impact scenario models"

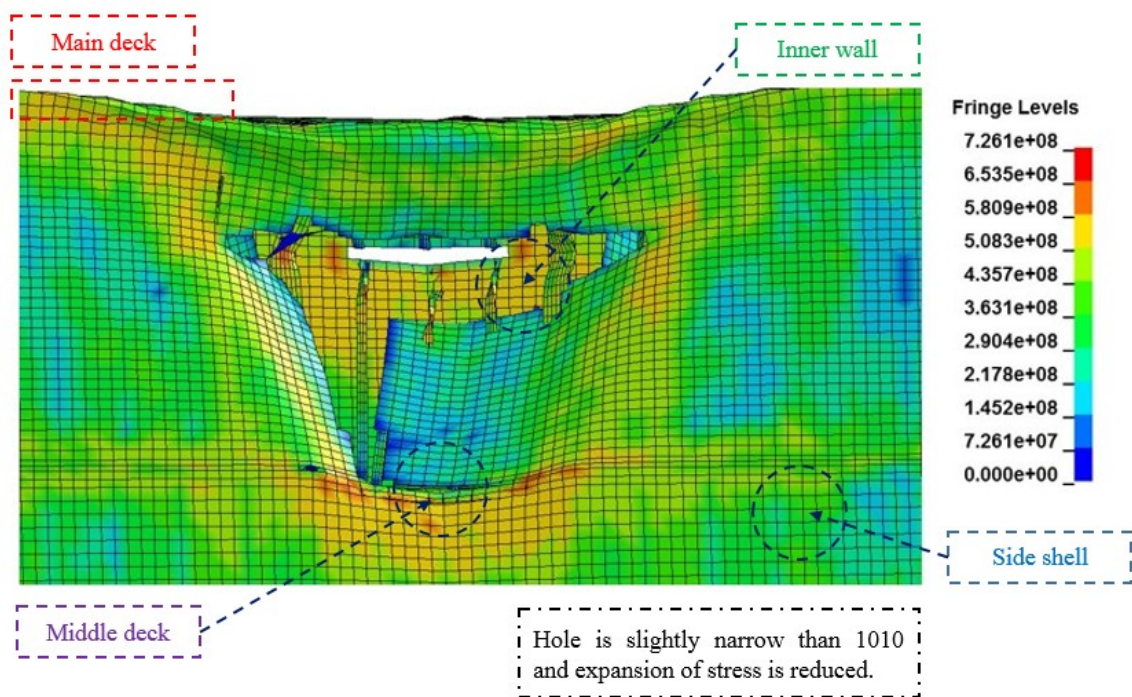

Figure A-2: Damage extent with Tresca contour by applied material type 1040.

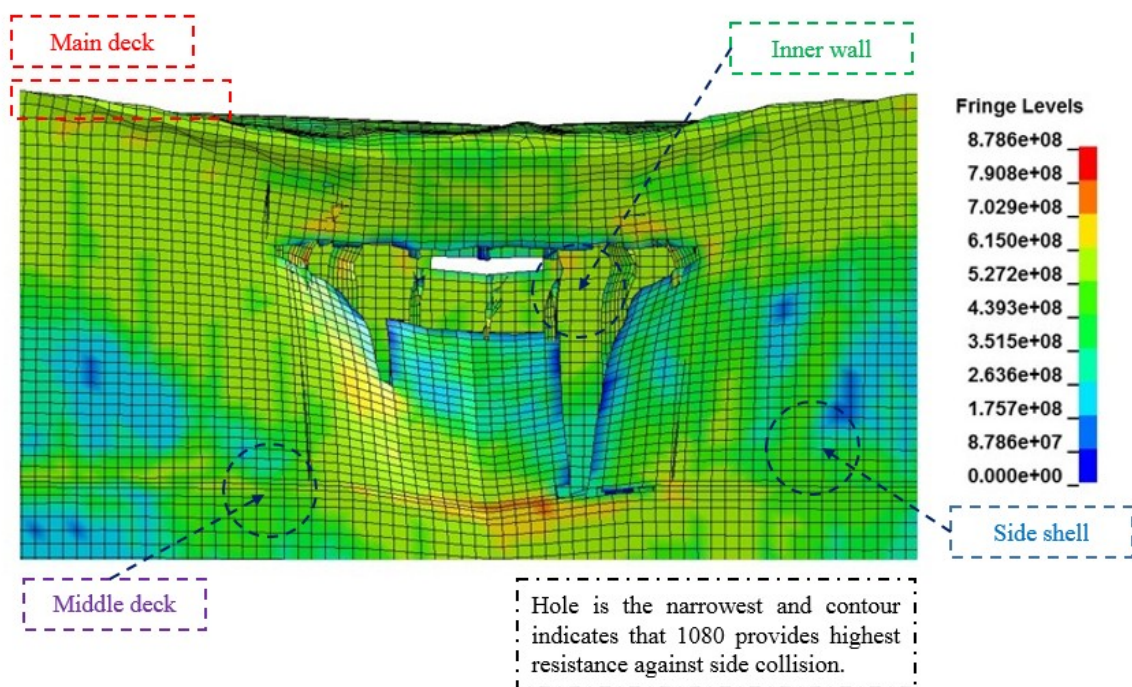

Figure A-3: Damage extent with Tresca contour by applied material type 1080.
